# Supplementary material for: A systematic review of dimensions evaluating patient experience in chronic illness
Source: Health Qual Life Outcomes. 2019 Jan 21;17:19. doi: 10.1186/s12955-019-1084-2 (PMC6341593; doi:10.1186/s12955-019-1084-2)
Supplement: Supplementary file 3 — Questionnaires assessing functional status or symptoms. (XLS 52 kb) [file 12955_2019_1084_MOESM3_ESM.xls]

## Sheet: Feuil1
Questionnaires (N=19)	Year of publication	Main purpose	Number of dimensions	Number of items	Scale format	Questionnaire language	Study population	Medical specialty	Categories of Dimensions
									Global dimension (N=1)	Physical dimension (N=11)	Functional dimension (N=15)	Social dimension (N=5)	Psychological dimension (N=4)	Illness perceptions (N=2)	Illness behaviors and coping (N=1)	Effects of treatment	Expectations and satisfaction with treatment	Experience of healthcare	Beliefs and adherence to treatment	Involvement in health care (N=3)	Patient's knowledge
The General Symptom Distress Scale (GSDS) [51]	2011	Symptoms	3	12	several-kinds	English, spanish	Variety of chronic conditions (e.g., cardiovascular disease, pulmonary disease, and cancer)	oncology		Symptoms			Symptom distress							Ability to manage symptoms
The Exacerbations of Chronic Pulmonary Disease Tool (EXACT) [45]	2011	Symptoms	3	14	likert-ordinal	English	Medical diagnosis of chronic obstructive pulmonary disease or chronic bronchitis	pneumology		Breathlessness; Cough and sputum; Chest symptoms
The self-administered chronic kidney disease symptom assessment instrument [46]	2010	Symptoms	4	37	likert-ordinal	English	Patients with CKD not treated with dialysis (estimated GFR of between 15 and 60 mL/min/1.73 m2 or have clinically significant proteinuria)	nephrology/urology		Neuropsychiatric; Cardiovascular; Uraemia; Anaemia
The symptom status two-factor model [47]	2007	Symptoms	2	19	likert-ordinal	English	Rheumatoid arthritis	rheumatology/orthopaedics		General symptoms; RA Pain Symptomn
The cGVHD Symptom Scale [48]	2002	Symptoms	7	30	likert-ordinal	English	Active chronic graft-versus-host disease following allogeniec stem cell transplant	hematology		Skin; Eye; Mouth; Energy	Lung function; Nutrition		Psychological status
The Geriatric Pain Measure (GPM) [50]	2000	Symptoms	5	24	several-kinds	English	Older persons with multiple medical problems	chronic disease		Pain intensity	Pain with ambulation; Pain with strenuous activities	Disengagement; Pain with other activities
The National Institutes of Health Chronic Prostatitis Symptom Index (NIH-CPSI) [49]	1999	Symptoms	3	9	several-kinds	English	Chronic prostatitis	nephrology/urology	Quality-of-life	Pain	Urinary function
The Pain Behavior Checklist (PBCL) [52]	1991	Symptoms	4	17	likert-ordinal	English	The two largest categories were back pain (47.5%) and other musculoskeletal pain (15.6%)	chronic pain		Facial/ Audible Expressions	Distorted Ambulation		Affective Distress		Seeking-Help
The DyNaChron (Chronic nasal dysfunction) questionnaire [57]	2012	Functional status	6	77	several-kinds	French	Nasal or sinus dysfunction for more than 3 months. Excluded if they presented nasal or sinus tumor or Rendu-Osler disease, or were under immediate post-operative care	oto-rhino-laryngology		Nasal obstruction; Anterior rhinorrhea; Posterior rhinorrhea; Facial pain; Cough	Sense of smell difficulty
The Neck Pain Driving Index (NPDI) [53]	2012	Functional status	1	12	likert-ordinal	English	Chronic whiplash-associated disorders	rheumatology/orthopaedics			Driving tasks
The Spinal Cord Injury-Falls Concern Scale (SCI-FCS) [54]	2010	Functional status	3	16	likert-ordinal	English	People with spinal cord injuries who are dependent on manual wheelchairs	neurology			Activities requiring minimal movement of the body's center of mass; large shifts of the body’s centre of mass; frequent movement of the arms and hands, reducing a person’s ability to use the hands to stabilize the body
The self-reported musculoskeletal functional limitations index [55]	2009	Functional status	1	6	likert-ordinal	English	Knee replacement	rheumatology/orthopaedics			knee-Hips-Back-Hands, wrists, arms or shoulders-Feet and ankles-Neck
The Impact on Participation and Autonomy (IPA) [60]	1999	Functional status	4	23	likert-ordinal	English	Various disabling conditions	chronic disease			Mobility and Leisure	Social relationships; Mobility and Leisure; Family role								Autonomy in self-care
The Inventory of Functional Status-Chronic Pain (IFS-CP) [59]	1998	Functional status	7	57	likert-ordinal	English	Women with chronic pain	chronic pain			Household activities;	Social and Community activities; Work Activities; School/Continuing Education Activities;Childcare activities; Care of Parents or Dependent Family Members Activities;								Personal Care Activities
The Pulmonary Functional Status Scale (PFSS) [58]	1998	Functional status	3	35	likert-ordinal	English	Chronic obstructive pulmonary disease, emphysema, bronchitis	pneumology			Daily activities/Social functioning; Psychological functioning; Sexual functioning	Daily activities/Social functioning	Psychological functioning
The 12-item Shoulder questionnaire [56]	1996	Functional status	1	12	likert-ordinal	English	Shoulder operations other than stabilisation	rheumatology/orthopaedics			Functional status
The Syncope Functional status questionnaire [61]	1994	Functional status	2	14	several-kinds	English	Recurrent syncope	internal medicine			Impairment Score			Fear/Worry Score
The Capacity of Daily Living during the Morning questionnaire (CDLM) and the Global Chest Symptoms Questionnaire in COPD (GCSQ) [62]	2010	Symptoms and Functional status	2	8	likert-ordinal	English	Severe chronic obstructive pulmonary disease	pneumology		GCSQ	CDLM
The Cardiovascular Limitations and Symptom Profile (CLASP) [63]	2002	Symptoms and Functional status	9	37	likert-ordinal	English	Chronic stable angina	cardiovascular disease		Angina; Shortness of breath; Ankle swelling;Tiredness	Mobility; Activities within the home; Gender	Social life and leisure activities		Concerns and worries
